# Supplementary material
Source: publisher site journal article supplement (https://www.dovepress.com/article/429638)
Supplement: Supplementary file 1 [file get_supplementary_file.php]

# Supplementary material

**Description of the qualitative thematic analysis**

The ***first phase*** was performed to become familiar with the data. In this study, data from paper surveys were manually transferred to a Microsoft Word document. Data transferred were patients’ responses to the following three open-ended questions: ‘’Other comments about your perceptions of high blood pressure (Hypertension)’’, ‘’Other comments about your perception of medicines perceptions of medicines prescribed for you’’, ‘’Other comments about your perceptions about medicines in general’’ as well as gender and country of birth. The answers were then read through repeatedly to get familiar with the content and create an overall picture.

The ***second phase*** concerned creating codes. It was applied by manually writing a short comment for each answer in the Word document, which describes the respondent’s overall point of view or what is interesting for the study question. For example, the following answer: ‘’If you are ill, it is good that there are medicines. The best medicine is probably physical activity’’ received the code ‘’non-pharmacological treatment’’. The answers were read through repeatedly to encode and give equal attention to each answer. Specific responses received only one code, broader responses were divided into two or three different codes, while irrelevant responses were not coded and excluded from the stud. Answers were coded as irrelevant responses where it appeared that the patient claimed they did not use antihypertensive medications, answers where the patient wrote about their other diseases, other medications or medications in general, and answers where the patient commented on remaining questions in the questionnaire that were not open-ended questions.

The ***third phase*** concerned sorting the codes that are connected under a theme. The World Health Organization's 5 dimensions of adherence constituted the five following themes, which were used to analyze data: 1) condition-related factors, 2) therapy-related factors, 3) health system-related factors, 4) patient-related factors, and 5) socioeconomic factors. In this study, the codes were created in an inductive way, that is, they emerged from data and not determined in advance. The themes, on the other hand, were created in a deductive way, which means that they are theory-driven. The third phase was applied by first copying and pasting one answer at a time to a new Microsoft Word document in an organized way, where each code formed a heading with associated answers below. All codes with their associated answers were moved in the document to be organized and stand under an appropriate theme.

The codes, which contained illness-related factors such as severity of symptoms and comorbidities were placed under the theme ‘’condition-related factors’’. Under the theme ‘’therapy-related factors’’, codes about pharmacological and non-pharmacological treatment, interactions and side effects were placed. Codes about the care organization, such as doctor visits, prescriptions and follow-up were placed under the theme ‘’health care team and system-related factors’’. Codes about patients' knowledge and experiences were placed under the theme ‘’patient-related factors’’. Under the theme ‘’socioeconomic-related factors’’, the code on economic impact was placed.

The ***fourth phase*** of the thematic analysis was about reviewing themes and achieving an external heterogeneity, which means that all themes should differ from each other. It was applied by checking whether the answers under each theme formed a coherent pattern. In case an answer did not fit under a specific theme, the answer could be placed in another existing appropriate theme or excluded from the analysis; an example is the answer ‘*’Poor packaging. Some are difficult to get out of the package*’’.

The ***fifth phase*** of the data analysis was to define themes and name them. In this study, this step was not fully followed since the themes were named by the World Health Organization.

The ***sixth and final phase*** of the thematic analysis was about writing the report and presenting the analysis by showing sufficient data extracts to the reader. This was to demonstrate that a certain theme really occurs, and that the theme had a significance for the research question.
